# Supplementary material for: Transcriptomic Analysis of Human Skeletal Muscle in Response to Aerobic Exercise and Protein Intake
Source: MDPI journal article supplement (doi:10.3390/nu15153485), 2023-08-07
Supplement: s1 [file s1]

*The description of supplementary Tables*

**Supplementary Table S1** The summarization of top 5 up- and down-regulated DEGs, co-DEGs ranking by the absolute value of log<sub>2</sub>FC and gene expression network of skeletal muscle in response to different interventions within each dataset

**Supplementary Table S2** The hub gene screening from co-DEGs calculated by Cytohubba plugin in Cytoscape software (ranked by Degree value).

**Supplementary Table S3** The GO enrichment analysis of co-DEGs from varied interventions in different populations.

**Supplementary Table S4** The KEGG enrichment analysis of co-DEGs from varied interventions in different populations.

**Supplementary Table S5** The gene sets related GO terms from GSEA in each dataset by different interventions.

**Supplementary Table S6** The gene sets related KEGG pathways from GSEA in each dataset by different interventions.

Note: YM, the younger male; OM, the older male; OF; the older female; AE, aerobic exercise; DEGs, differentially expressed genes; co-DEGs, co-differentially expressed genes; GO, Gene Ontology; KEGG, Kyoto Encyclopedia of Genes and Genomes; GSEA, gene set enrichment analysis.

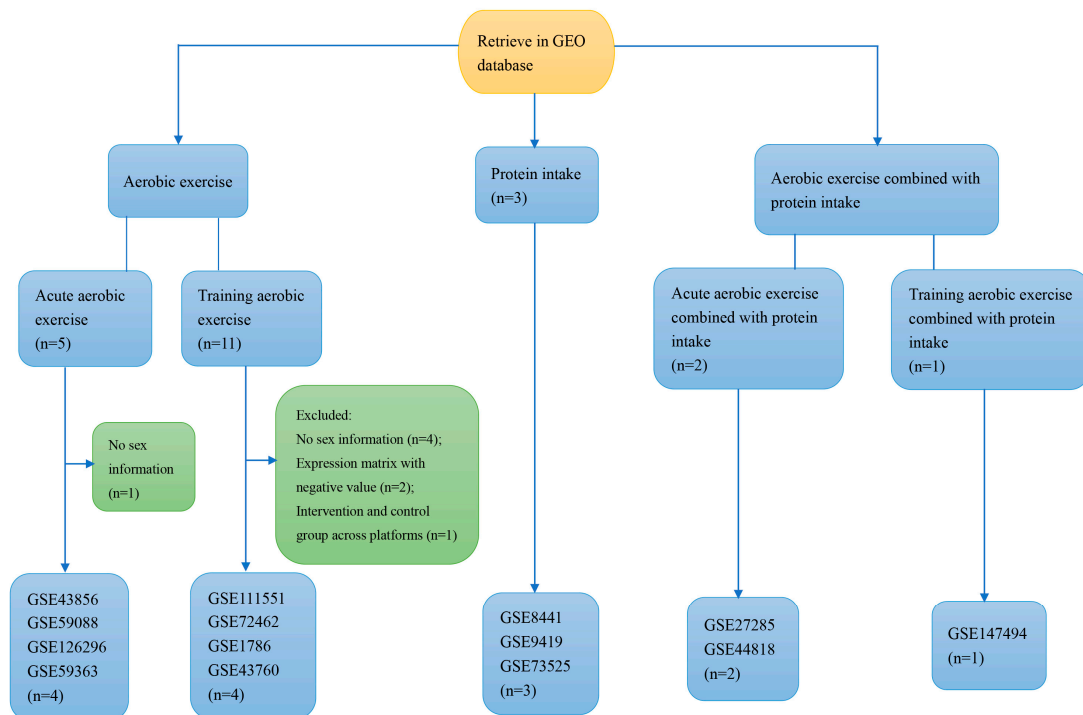

**Supplementary Figure S1** Flowchart of the screening of GEO datasets.

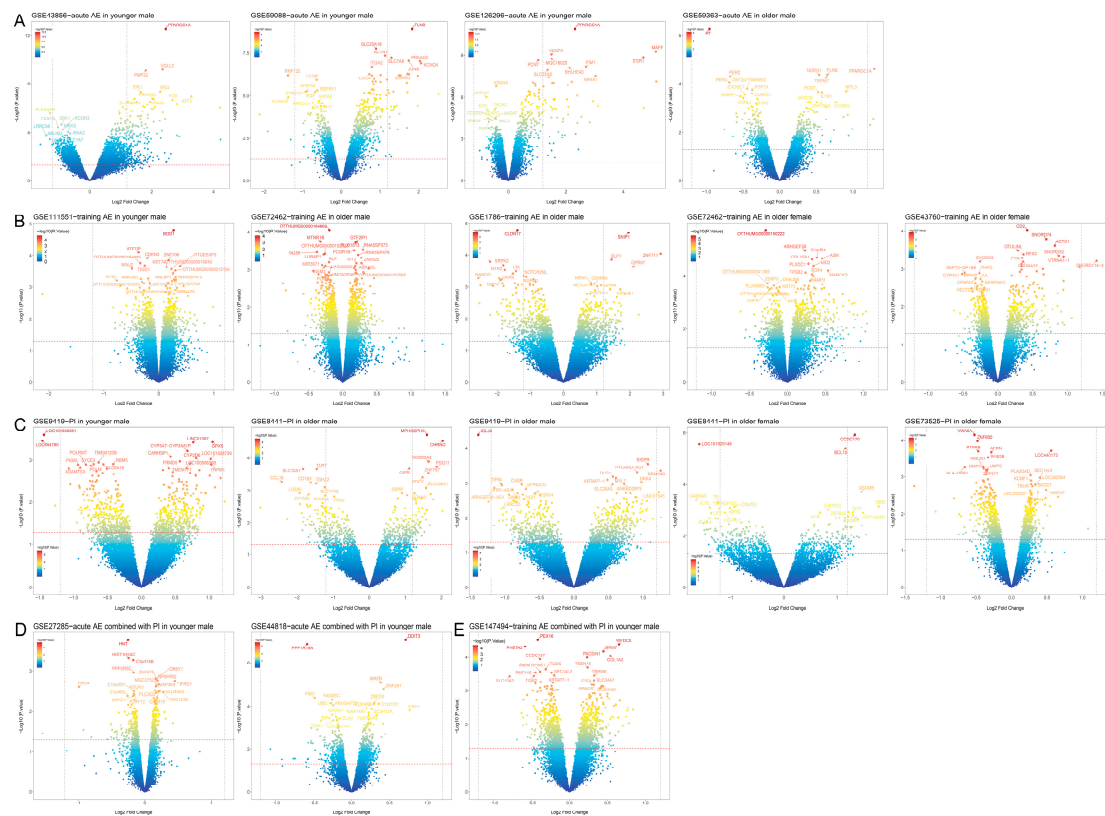

**Supplementary Figure S2** Volcano plots across interventions for each dataset. The significantly upregulated and downregulated DEGs at the first 10 ranks were noted.

(A) Acute AE (GSE43856, GSE59088, GSE126296 and GSE59363); (B) Training AE (GSE111551, GSE72462, GSE1786 and GSE43760); (C) PI (GSE9419, GSE8441 and GSE73525); (D) Acute AE combined with PI (GSE27285 and GSE44818); (E) Training AE combined with PI (GSE147494).

Note: AE, aerobic exercise; PI, protein intake.

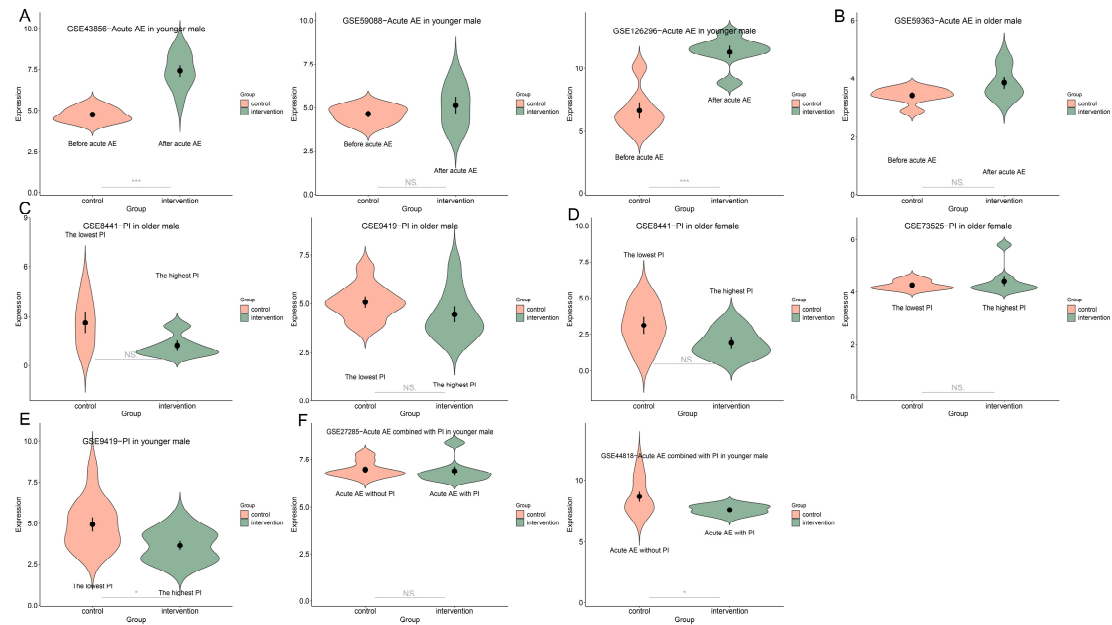

**Supplementary Figure S3 (A-F)** The expression levels of *FOS* in each dataset by different interventions. (A) Acute AE in the younger male (GSE43856, GSE59088 and GSE126296); (B) Acute AE in the older male (GSE59363); (C) PI in the older male (GSE8441 and GSE9419); (D) PI in the older female (GSE8441 and GSE73525); (E) PI in the younger male (GSE9419); (F) Acute AE combined with PI in the younger male (GSE27285 and GSE44818). Note: AE, aerobic exercise; PI, protein intake.

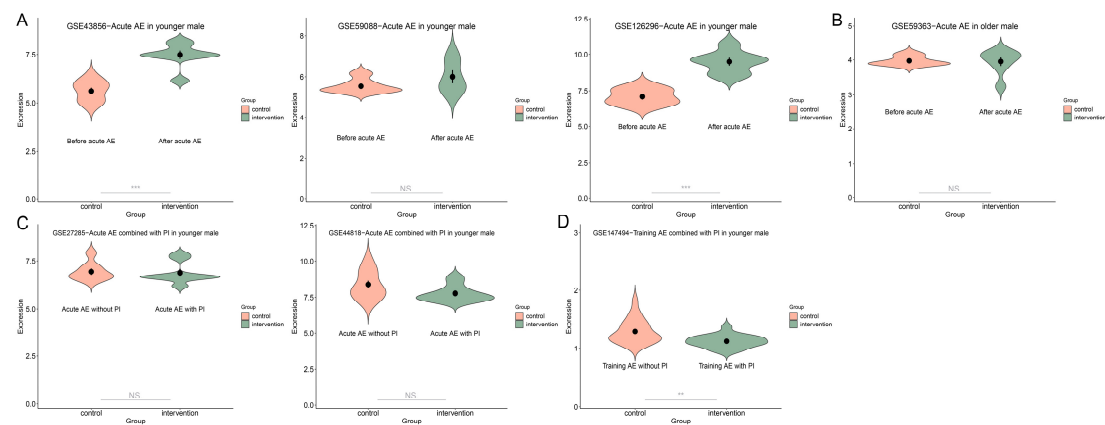

**Supplementary Figure S4 (A-D)** The expression levels of MYC in each dataset by different interventions. (A) Acute AE in the younger male (GSE43856, GSE59088 and GSE126296); (B) Acute AE in the older male (GSE59363); (C) Acute AE combined with PI in the younger male (GSE27285 and GSE44818); (D) Training AE combined with PI in the younger male (GSE147494).

Note: AE, aerobic exercise; PI, protein intake.

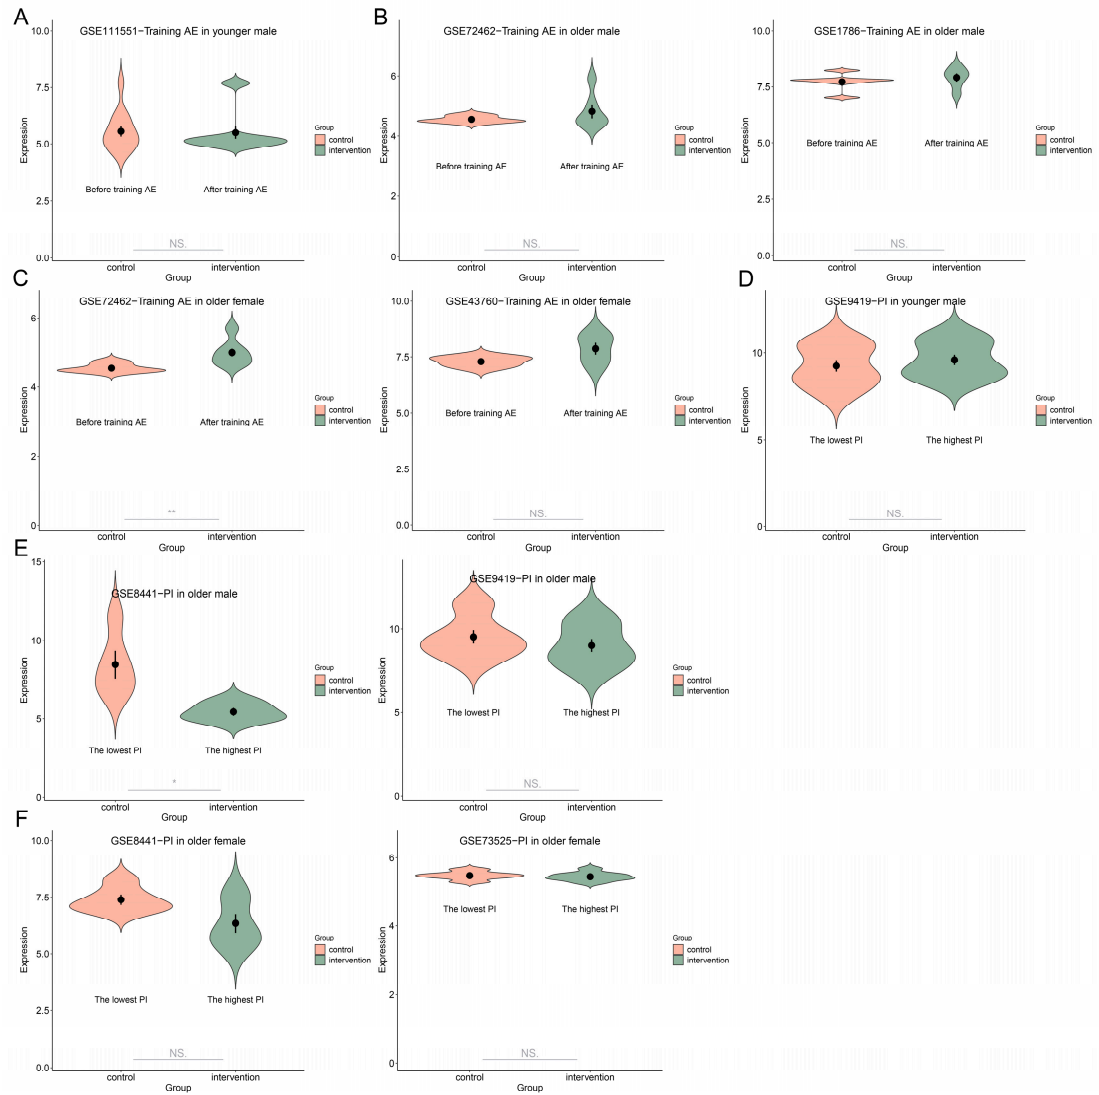

**Supplementary Figure S5 (A-G)** The expression levels of *COL1A1* in each dataset by different interventions. (A) Training AE in the younger male (GSE111551); (B) Training AE in the older male (GSE72462 and GSE1786); (C) Training AE in the older female (GSE72462 and GSE43760); (D) PI in the younger male (GSE9419); (E) PI in the older male (GSE8441 and GSE9419); (F) PI in the older female (GSE8441 and GSE73525).

Note: AE, aerobic exercise; PI, protein intake.

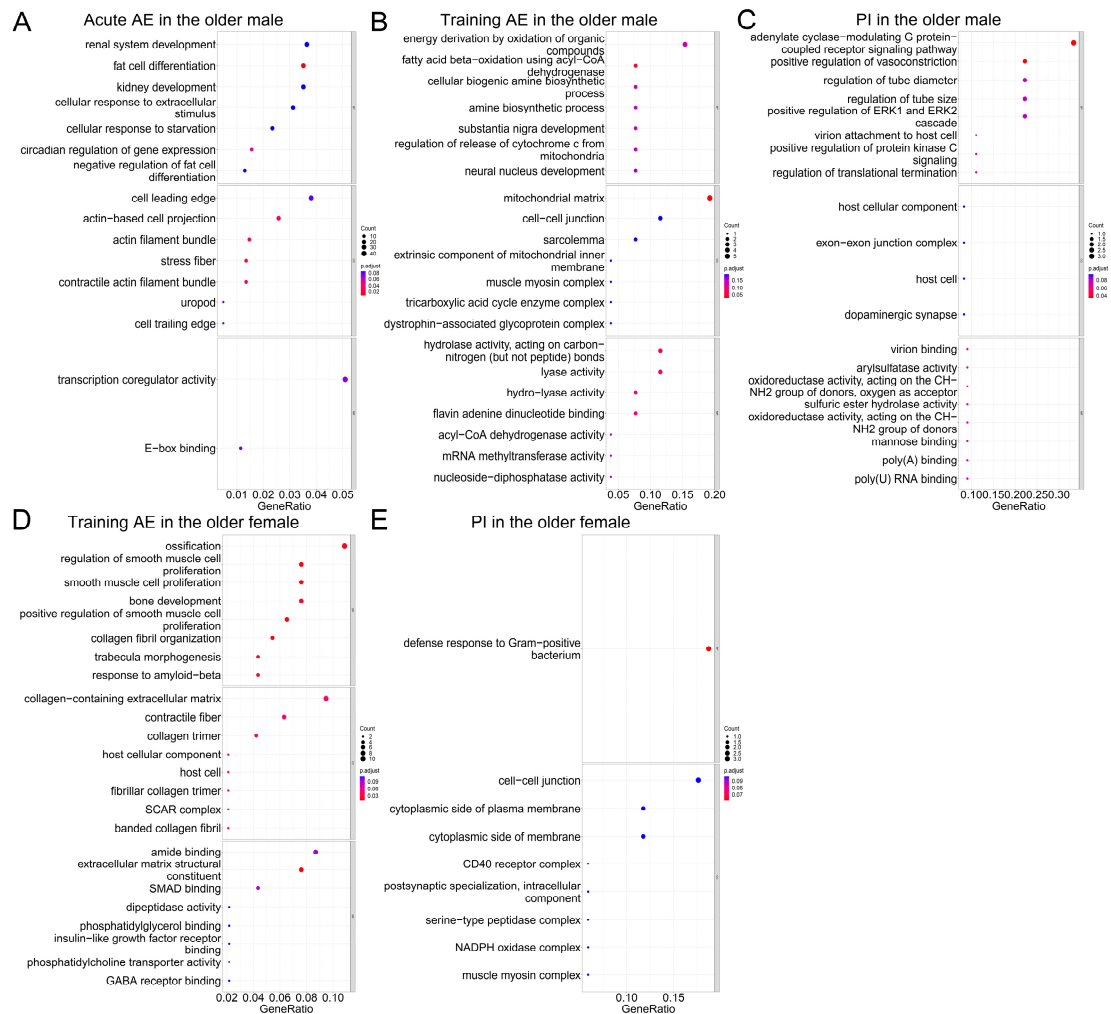

**Supplementary Figure S6** The GO enrichment analysis of co-DEGs from varied interventions in the older people. (A) acute AE in the older male; (B) training AE in the older male; (C) PI in the older male; (D) Training AE in the older female; (E) PI in the older female.

Note: GO, Gene Ontology; co-DEGs, co- differentially expressed genes; AE, aerobic exercise; PI, protein intake.

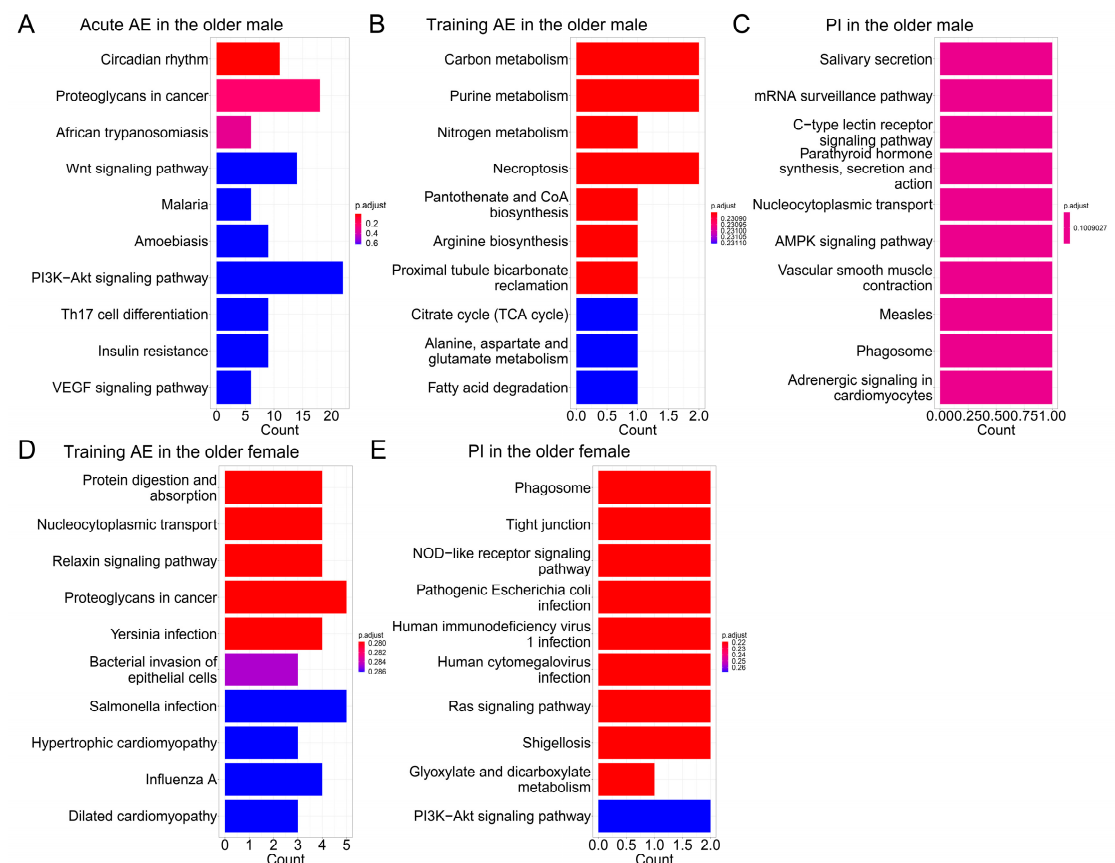

**Supplementary Figure S7** The KEGG enrichment analysis of co-DEGs from varied interventions in the older people. (A) acute AE in the older male; (B) training AE in the older male; (C) PI in the older male; (D) Training AE in the older female; (E) PI in the older female.

Note: KEGG, Kyoto Encyclopedia of Genes and Genomes; co-DEGs, co-differentially expressed genes; AE, aerobic exercise; PI, protein intake.

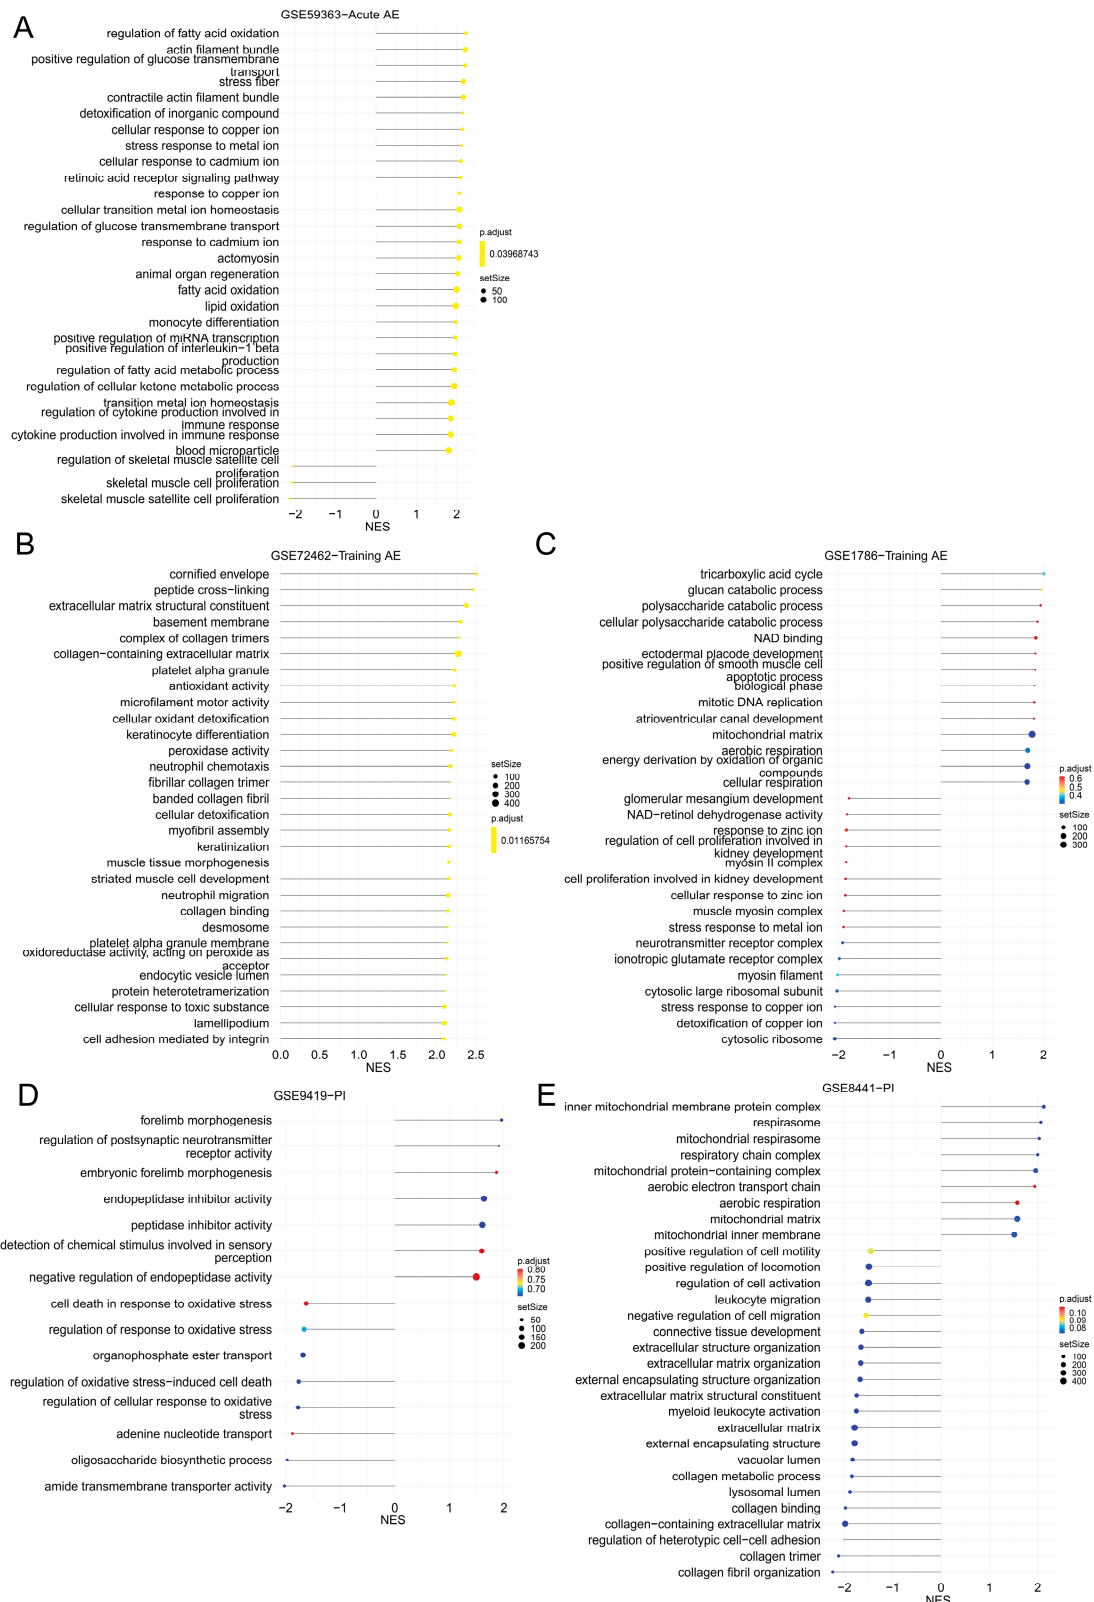

**Supplementary Figure S8** The gene sets related GO terms from GSEA in each dataset by different interventions in the older male. (A) GSE59363-Acute AE; (B) GSE72462-Training AE; (C) GSE1786-Training AE; (D) GSE9419-PI; (E) GSE8441-PI.

Note: GO, Gene Ontology; GSEA, gene set enrichment analysis; AE, aerobic exercise; PI, protein intake; NES, normalized enrichment score.

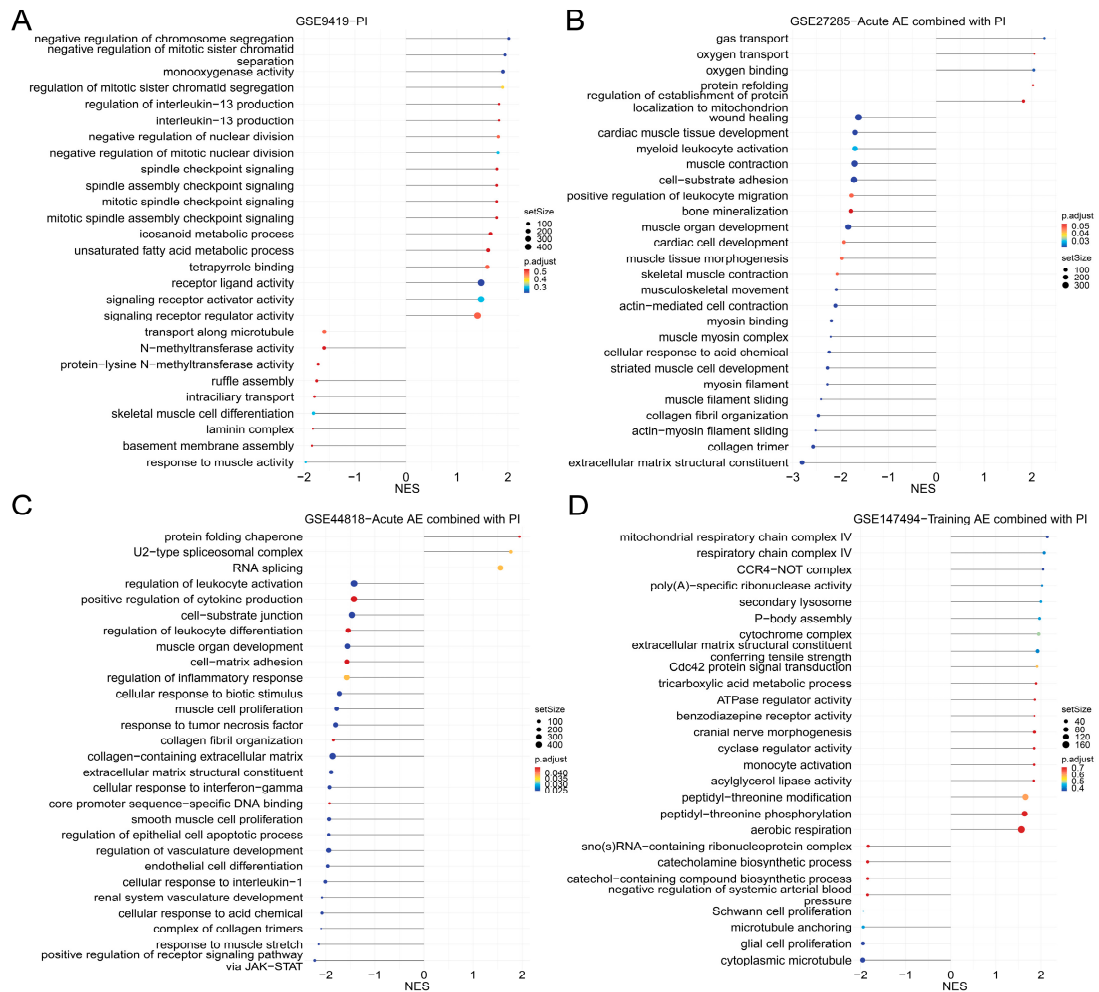

**Supplementary Figure S9** The gene sets related GO terms from GSEA in each dataset by varied interventions in the younger male. (A) GSE9419-PI; (B) GSE27285-Acute AE combined with PI; (C) GSE44818-Acute AE combined with PI; (D) GSE147494-Training AE combined with PI.

Note: GO, Gene Ontology; GSEA, gene set enrichment analysis; AE, aerobic exercise; PI, protein intake; NES, normalized enrichment score.

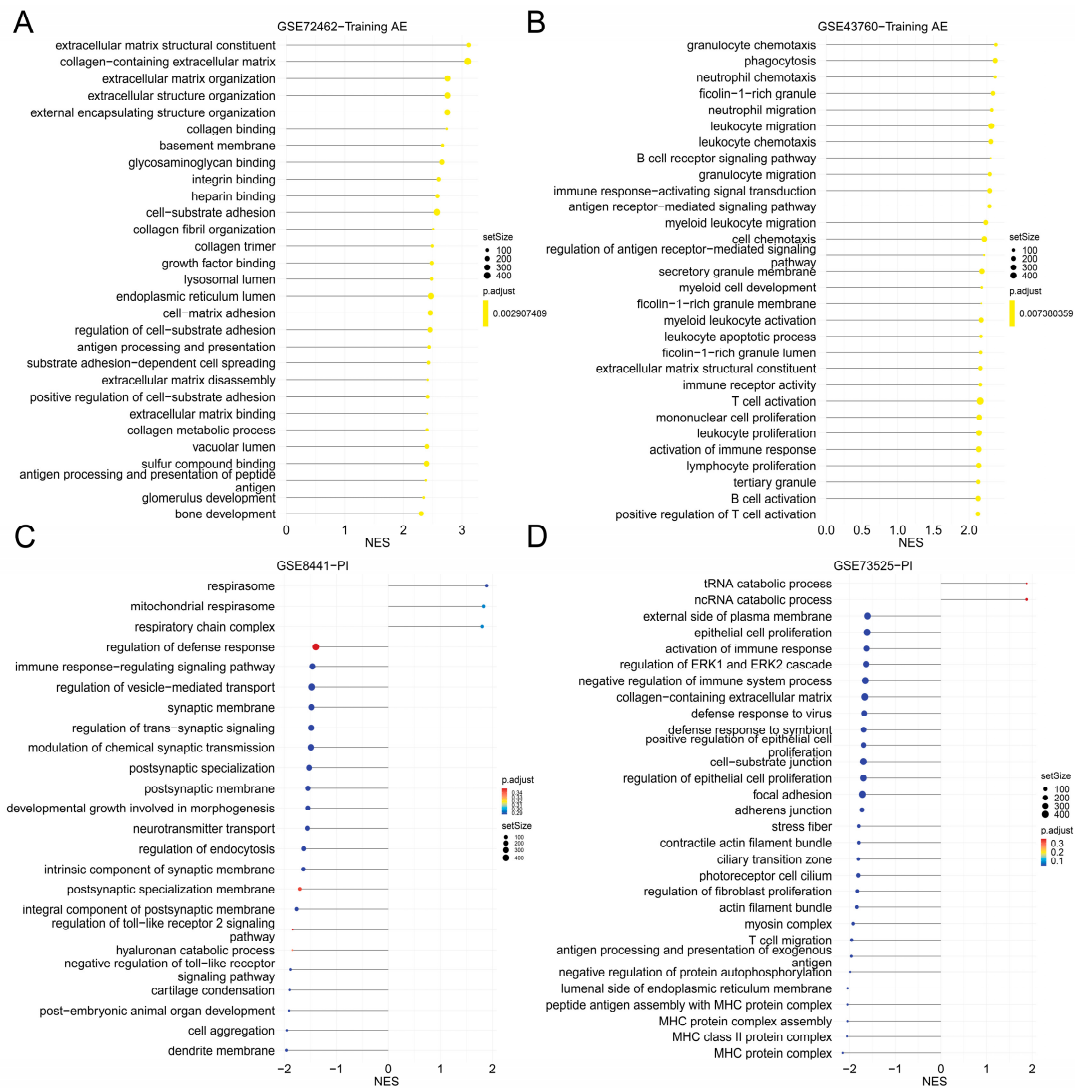

**Supplementary Figure S10** The gene sets related GO terms from GSEA in each dataset by different interventions in the older female. (A) GSE72462-Training AE; (B) GSE43760-Training AE; (C) GSE8441-PI; (D) GSE73525-PI.

Note: GO, Gene Ontology; GSEA, gene set enrichment analysis; AE, aerobic exercise; PI, protein intake; NES, normalized enrichment score.

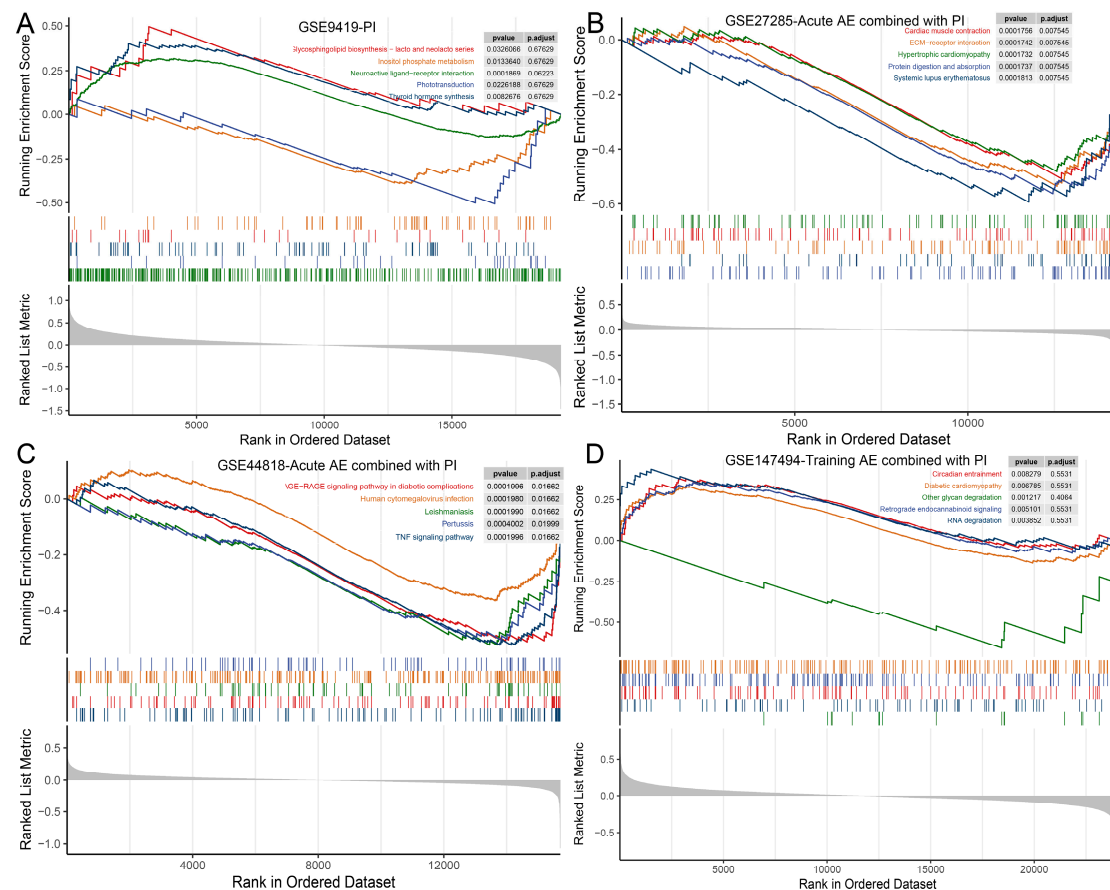

**Supplementary Figure S11** Top 5 KEGG-pathway-related gene sets from GSEA by different interventions in the younger male. (A) GSE9419-PI; (B) GSE27285-Acute AE combined with PI; (C) GSE44818-Acute AE combined with PI; (D) GSE147494-Training AE combined with PI.

Note: KEGG, Kyoto Encyclopedia of Genes and Genomes; GSEA, gene set enrichment analysis; AE, aerobic exercise; PI, protein intake.

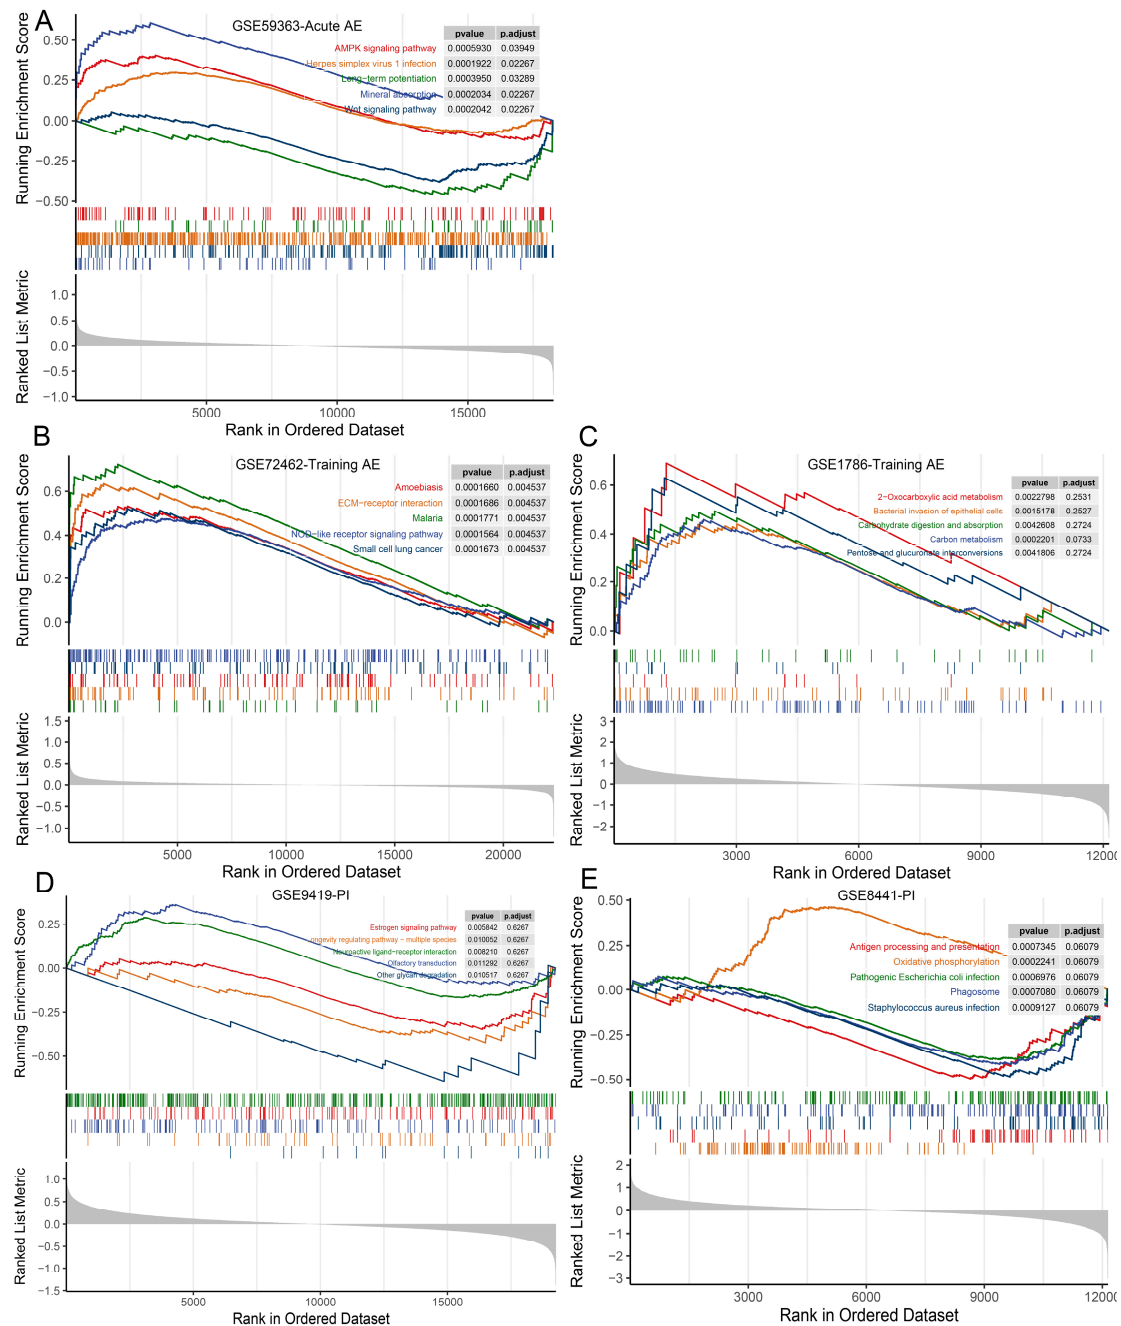

**Supplementary Figure S12** Top 5 KEGG-pathway-related gene sets from GSEA in each dataset by different interventions in the older male. (A) GSE59363-Acute AE; (B) GSE72464-Training AE; (C) GSE1786-Training AE; (D) GSE9419-PI; (E) GSE8441-PI.

Note: KEGG, Kyoto Encyclopedia of Genes and Genomes; GSEA, gene set enrichment analysis; AE, aerobic exercise; PI, protein intake.

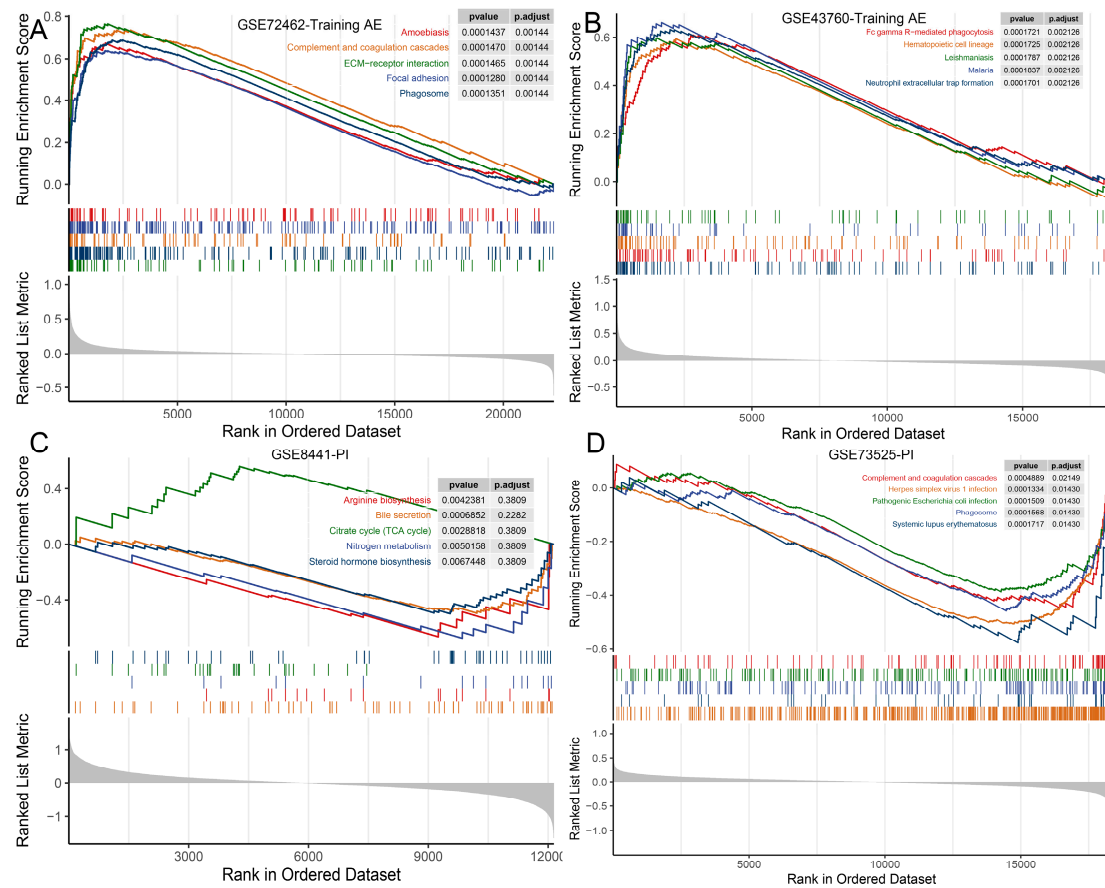

**Supplementary Figure S13** The top 5 KEGG-pathway-related gene sets from GSEA in each dataset by different interventions in the older female. (A) GSE72462-Training AE; (B) GSE43760-Training AE; (C) GSE8441-PI; (D) GSE73525-PI.

Note: KEGG, Kyoto Encyclopedia of Genes and Genomes; GSEA, gene set enrichment analysis; AE, aerobic exercise; PI, protein intake.
